# Supplementary material for: circRNA Mediates Silica-Induced Macrophage Activation Via HECTD1/ZC3H12A-Dependent Ubiquitination
Source: PubMed Central journal article supplement — Theranostics. 2018 Jan 1;8(2):575–92. doi: 10.7150/thno.21648 (PMC5743568; doi:10.7150/thno.21648), 2018-01-01
Supplement: thnov08p0575s1.pdf [file thnov08p0575s1.pdf]

1 **Supplementary information**

2

3 **Manuscript title: circRNA Mediates Silica-induced Macrophage Activation**  
4 **via HECTD1/ZC3H12A-dependent Ubiquitination**

5

6 Authors: Zhou, Jiang, Yang, Guo, Fang, Zhang, Cheng, Wang, Yao, and Chao

7

8 **Table of contents**

9

|    |                         |     |
|----|-------------------------|-----|
| 10 | Supplementary Methods   | 2-4 |
| 11 | Supplementary Figure S1 | 5   |
| 12 | Supplementary Figure S2 | 6-7 |
| 13 | Supplementary Figure S3 | 8-9 |
| 14 | Supplementary Figure S4 | 10  |
| 15 | Supplementary Table S1  | 11  |

16

17

## 18 Methods

### 19 **Microarray and quantitative analyses**

20 Agilent Feature Extraction software (version 11.0.1.1) was used to  
21 analyze the acquired array images. Quantile normalization and subsequent  
22 data processing were performed with the R software package. Mouse lung  
23 tissues were immediately flash-frozen in liquid nitrogen and then homogenized  
24 with TRIzol reagent (Invitrogen). The amount of total RNA in each sample was  
25 quantified using a NanoDrop ND-1000 spectrophotometer. Sample preparation  
26 and microarray hybridization were performed based on standard Arraystar  
27 protocols.

### 28 **Fluorescent *in situ* hybridization (FISH)**

29 Cellular circHECTD1 expression was detected via fluorescent *in situ*  
30 hybridization (FISH) using a mixture of biotin-labeled DNA oligo probes that  
31 were specific for either endogenous or ectopically expressed circHECTD1.  
32 Briefly, cells were freshly fixed in 4% paraformaldehyde (PFA) for 15 min at  
33 room temperature, washed twice with PBS, immersed in 70% ethanol overnight  
34 at 4 °C, permeabilized with 0.25% Triton X-100 for 15 min, and subjected to two  
35 15-min washes with saline-sodium citrate (SSC) buffer. *In situ* hybridization was  
36 performed overnight at 37 °C using 10 pM biotin-labeled DNA oligo probes in  
37 hybridization buffer (HB), and this step was followed by serial washes with SSC  
38 buffer. The samples were then incubated in blocking buffer (1% BSA and 3%  
39 normal goat serum in PBS) for 1 h at room temperature and then with an anti-

40 biotin HRP antibody (1:200) in blocking buffer overnight at 4 °C. The samples  
41 were subsequently subjected to 2-min washes with PBS. Finally, DNA was  
42 stained with DAPI, and cell images were captured using a fluorescence  
43 microscope (Olympus BX53, Olympus America, Inc., Center Valley, PA, USA).

#### 44 **RNA-binding protein immunoprecipitation (RIP)**

45 The RIP experiments were performed according to the manufacturer's  
46 recommended protocol (Millipore). Briefly,  $1-3 \times 10^7$  cells were washed twice with  
47 ice-cold PBS and lysed in 200  $\mu$ L of RIP lysis buffer. Then, 50  $\mu$ L of a magnetic  
48 bead suspension was transferred to each tube. The samples were  
49 subsequently washed twice with RIP wash buffer and resuspended in 100  $\mu$ L  
50 of RIP wash buffer, and 5  $\mu$ g of the antibody of interest was then added to each  
51 tube. After incubation for 30 min at room temperature, the obtained pellets were  
52 washed three times with RIP wash buffer and resuspended in 900  $\mu$ L of RIP  
53 immunoprecipitation buffer. Next, 100  $\mu$ L of the supernatant of the RIP lysate  
54 was added to each tube to a final volume of 1000  $\mu$ L, and after overnight  
55 incubation at 4 °C, the pellets were washed six times with RIP Wash Buffer and  
56 resuspended in 150  $\mu$ L of Proteinase K buffer at 55 °C for 30 min. The purified  
57 co-precipitated RNA was subjected to qRT-PCR to analyze the presence of  
58 binding using the respective primers.

#### 59 **Quantitative reverse transcription-polymerase chain reaction (qRT-PCR)**

60 Total RNA was extracted using the TRIzol reagent (Takara, Japan), and  
61 the RNA was reverse transcribed with the HiScript<sup>®</sup>Q Select RT SuperMix for

62 qPCR (+gDNA wiper) Kit (Vazyme, Nanjing, China). Real-time PCR was  
63 subsequently performed with the AceQ<sup>®</sup> qPCR SYBR Green Master Mix (High  
64 ROX Premixed) Kit (Vazyme, Nanjing, China). The results were standardized  
65 to control values of glyceraldehyde-3-phosphate dehydrogenase (GAPDH).  
66

67 **Supplementary Figure S1**

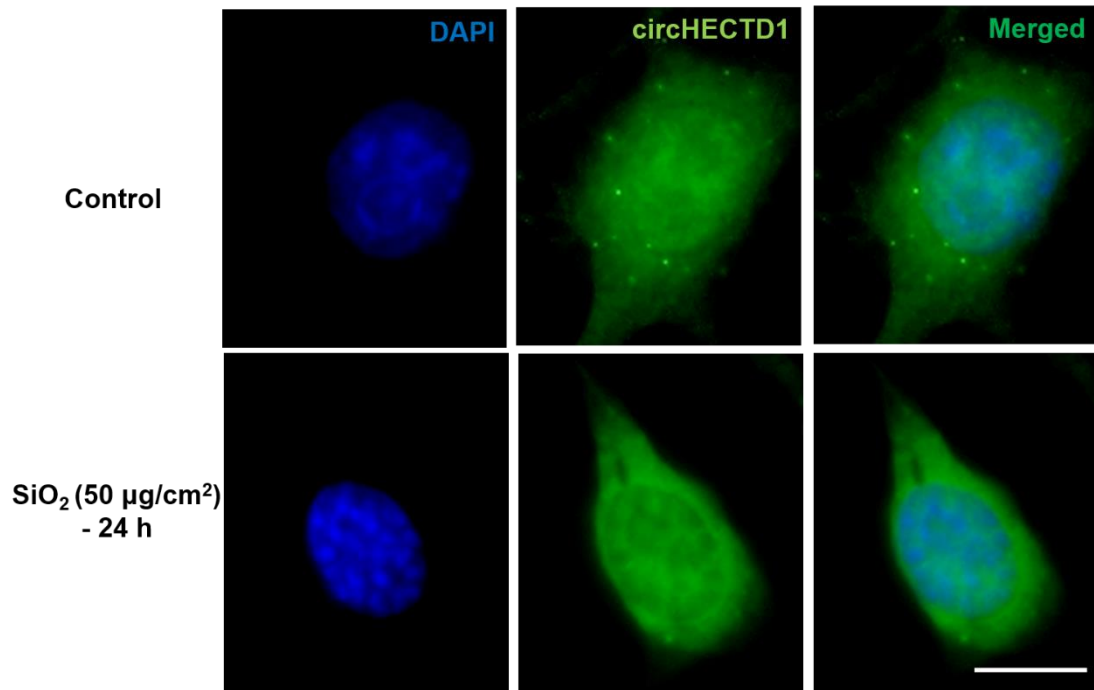

68

69 **Figure S1 Expression of circHECTD1 in macrophages after exposure to**

70 **SiO<sub>2</sub>.**

71 circHECTD1 was mainly detected in the cytoplasm of RAW264.7 cells in FISH

72 assays.

73

74

75

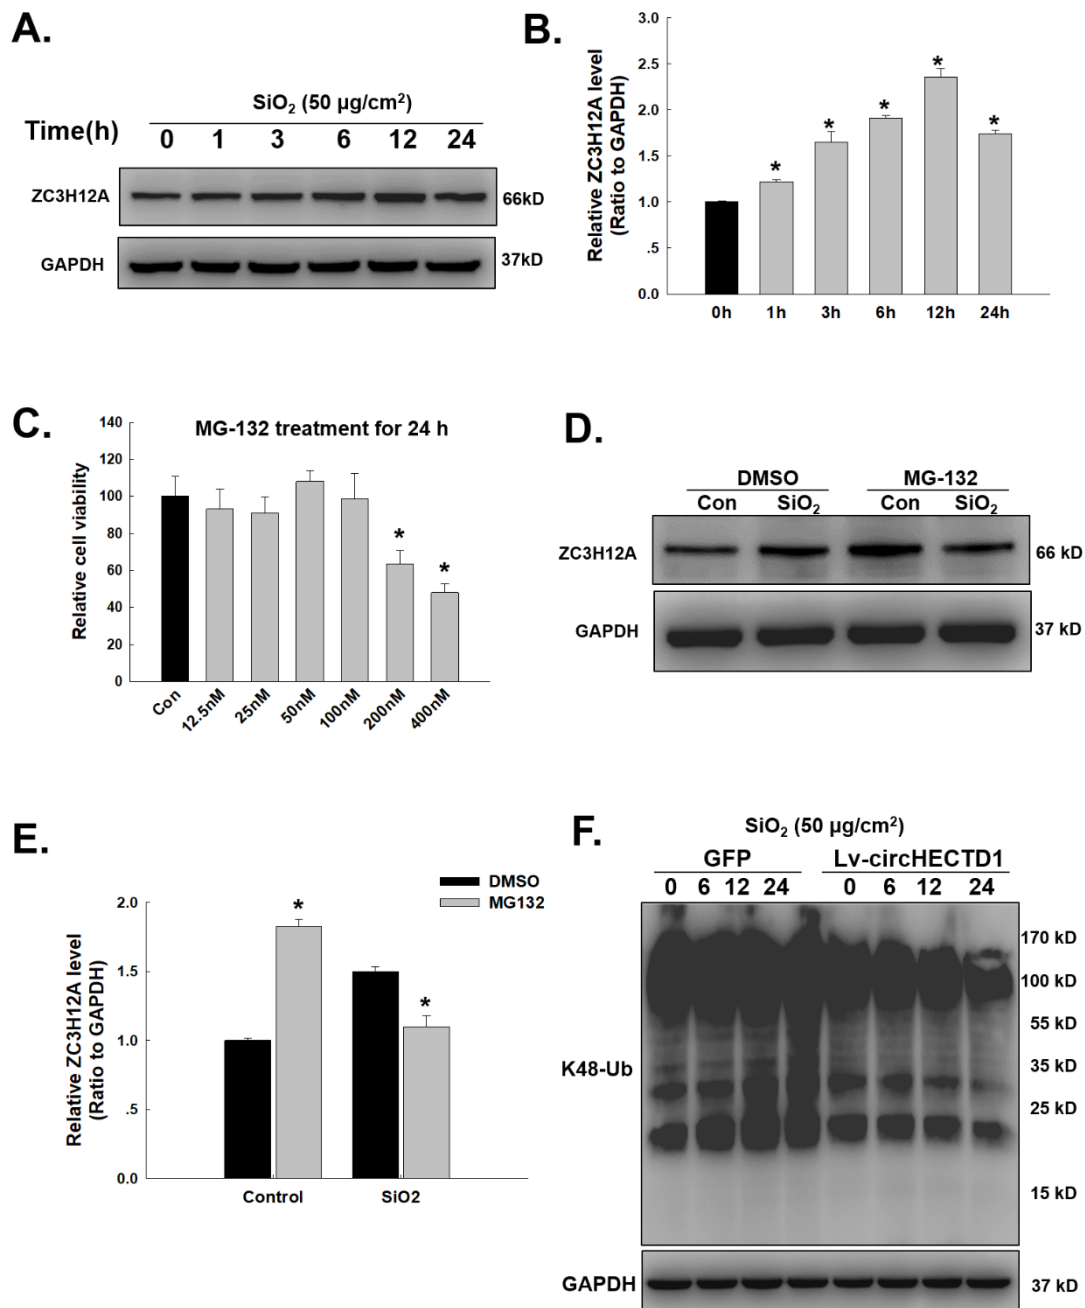

77

78 **Figure S2 ZC3H12A expression is mediated by the ubiquitin-proteasome**  
 79 **system and its own feedback regulation.**

80 **(A)** Representative western blot showing the effects of SiO<sub>2</sub> (50 µg/cm<sup>2</sup>) on  
 81 ZC3H12A expression in RAW264.7 cells. **(B)** Densitometric analyses of five  
 82 separate experiments suggested that SiO<sub>2</sub> induced ZC3H12A expression in a

83 time-dependent manner. \* $P$ <0.05 vs. 0 h. **(C)** According to the results of the  
84 MTT assay, MG-132, a proteasome inhibitor, decreased the viability of  
85 RAW264.7 cells (n=5); \* $P$ <0.05 vs. the control group. **(D)** Representative  
86 western blot showing the effects of MG-132 (50 nM) and SiO<sub>2</sub> (50 μg/cm<sup>2</sup>) on  
87 ZC3H12A expression in RAW264.7 cells. **(E)** Densitometric analyses of five  
88 separate experiments suggested that MG-132 could enhance ZC3H12A  
89 expression, but not when combined with SiO<sub>2</sub>. \* $P$ <0.05 vs. the corresponding  
90 control group. **(F)** Transfection of the circHECTD1 lentivirus in RAW264.7 cells  
91 showed that K48-ubiquitin was downregulated by circHECTD1.  
92

93 **Supplementary Figure S3**

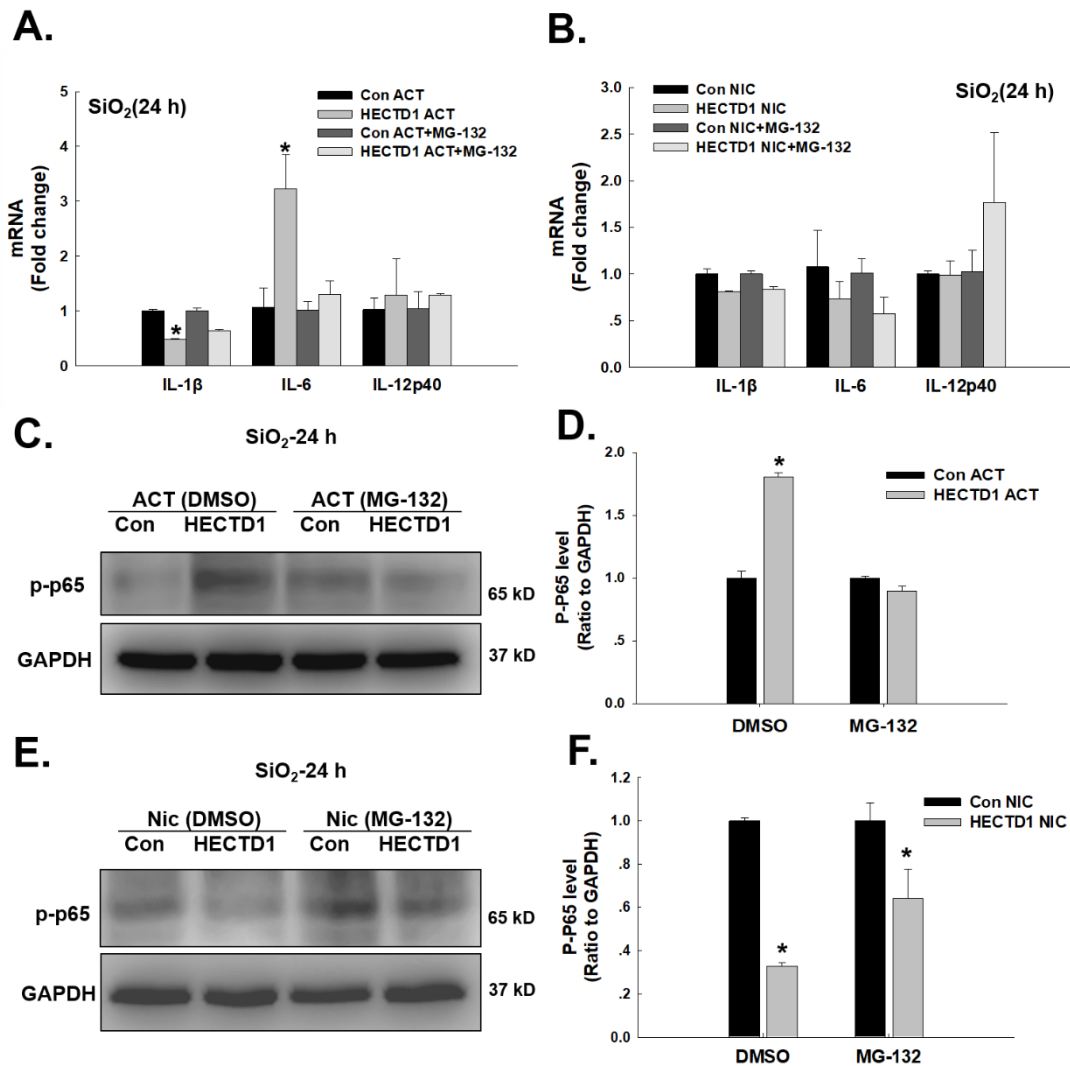

94

95 **Figure S3 Transfection of the HECTD1 CRISPR activation plasmid (ACT)**  
 96 **and CRISPR double nickase plasmid (NIC) with or without MG-132 in**  
 97 **RAW264.7 cells.**

98 **(A)** As shown in the qRT-PCR analysis, transfection with HECTD1 ACT with or  
 99 without MG-132 could regulate the IL-1 $\beta$  and IL-6 mRNA levels in RAW264.7  
 100 cells but not that of IL-12p40 mRNA, and **(B)** transfection with HECTD1 NIC  
 101 with or without MG-132 had no effect on these mRNAs. (n=5); \**P*<0.05 vs. the  
 102 corresponding control group. Representative western blot showing the effects



103 of **(C)** HECTD1 ACT or **(E)** NIC transfection with or without MG-132 on p-p65  
104 expression in RAW264.7 cells. Densitometric analyses of five separate  
105 experiments suggested that **(D)** HECTD1 ACT or **(F)** NIC transfection with or  
106 without MG-132 affected p-p65 expression in RAW264.7 cells (n=5); \* $P < 0.05$   
107 vs. the corresponding control group.

108 **Supplementary Figure S4**

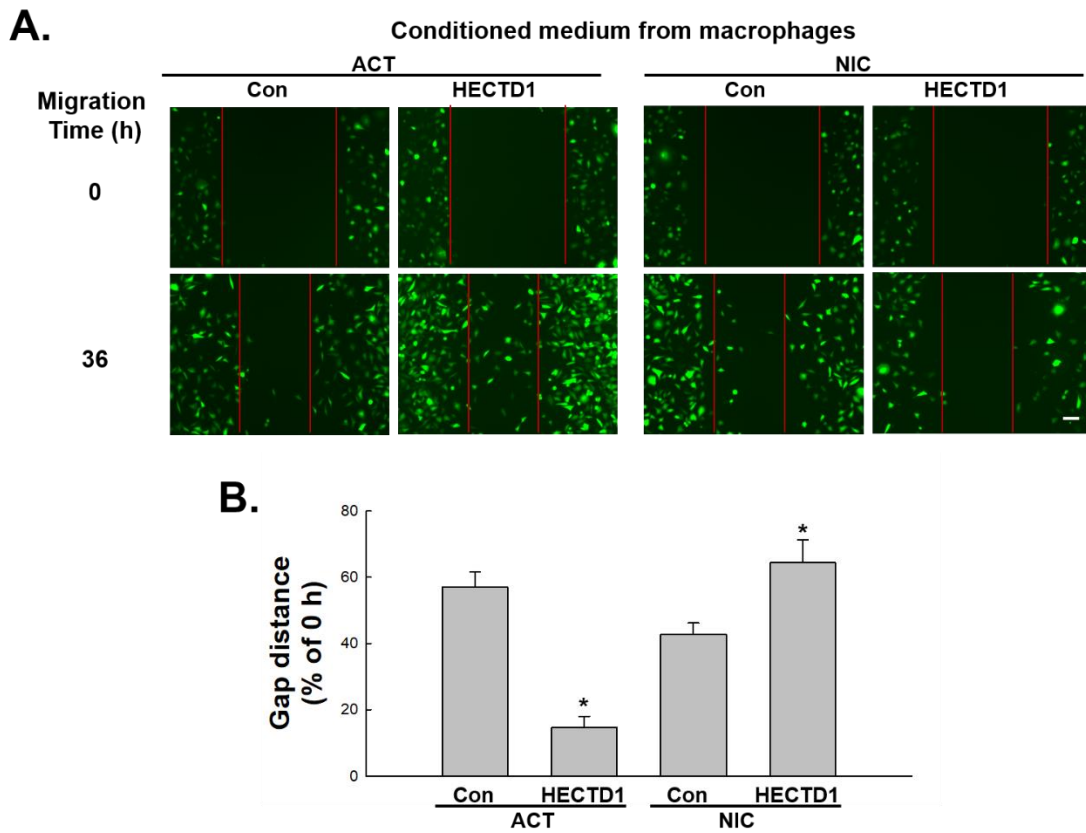

109

110 **Figure S4 Regulatory effects of HECTD1 on the activation and migration**  
111 **of fibroblasts.**

112 (A) Representative images showing the effects of conditioned media from  
113 RAW264.7 cells on the migration of GFP-labeled L929 cells. Scale bar=80  $\mu$ m.

114 (B) Quantification of scratch width in six separate experiments. \* $P$ <0.05 vs. the  
115 corresponding control group.

116

117 **Supplementary Table S1**

118 **Quantitative reverse transcription-polymerase chain reaction (qRT-PCR)**

119 **primers and FISH probe**

| <b>mRNA qPCR primers</b>           |                                     |                          |
|------------------------------------|-------------------------------------|--------------------------|
| <b>Gene</b>                        | <b>Forward (5'-3')</b>              | <b>Reverse (5'-3')</b>   |
| GAPDH (mouse)                      | TGTGTCCGTCGTGGATCTGA                | CCTGCTTCACCACCTTCTTGA    |
| HECTD1 (mouse)                     | TTGAAACATGTCCACCTCGT                | CACGGGCTGTACCTCTAAG      |
| IL-1 $\beta$ (mouse)               | TGCCACCTTTTGACAGTGATG               | ATGTGCTGCTGCGAGATTTG     |
| IL-6 (mouse)                       | CCGGAGAGGAGACTTCACAG                | ACAGTGCATCATCGCTGTTC     |
| IL-12p40 (mouse)                   | CAGAAGCTAACCATCTCCTGGTTTG           | CCGGAGTAATTTGGTGCTTCACAC |
| <b>circRNA qPCR primers</b>        |                                     |                          |
| <b>Name</b>                        | <b>Forward (5'-3')</b>              | <b>Reverse (5'-3')</b>   |
| circHECTD1 (Divergent primer)      | AACTTAGGCGTATTTGGGAGC               | ACATAGTCGTCATCCCAGGC     |
| circHECTD1 (Convergent primer)     | GCCTGGGATGACGACTATGT                | GCTCCCAAATACGCCTAAGTT    |
| <b>Fish probe</b>                  |                                     |                          |
| <b>circRNA</b>                     | <b>Sequence</b>                     |                          |
| mmu_circHECTD1 (Biotin-fish probe) | aaaCATACTCTTCTTCTTCGTGTAAGTGGGCTCCC |                          |

120
